# Supplementary material for: Algorithm in the Diagnosis of Febrile Illness Using Pathogen-specific Rapid Diagnostic Tests
Source: PubMed Central journal article supplement (PMC7245147; doi:10.1093/cid/ciz665), 2019-07-17
Supplement: ciz665_suppl_supplementary_information.pdf [file ciz665_suppl_supplementary_information.pdf]

# Algorithm in the diagnosis of Febrile Illness using pathogen-specific Rapid Diagnostic Tests

## Supplementary materials:

Authors: Sunil Pokharel, Lisa J White, Ricardo Aguas, Olivier Celhay, Karel G Pellé, Sabine Dittrich

## Supplementary contents:

|                                            |    |
|--------------------------------------------|----|
| 1. Equations for simultaneous testing..... | 2  |
| 2. Equations for sequential testing.....   | 3  |
| 3. Correct diagnosis.....                  | 4  |
| 4. R script for simultaneous testing.....  | 5  |
| 5. R script for sequential testing.....    | 10 |

## Equations: Simultaneous testing

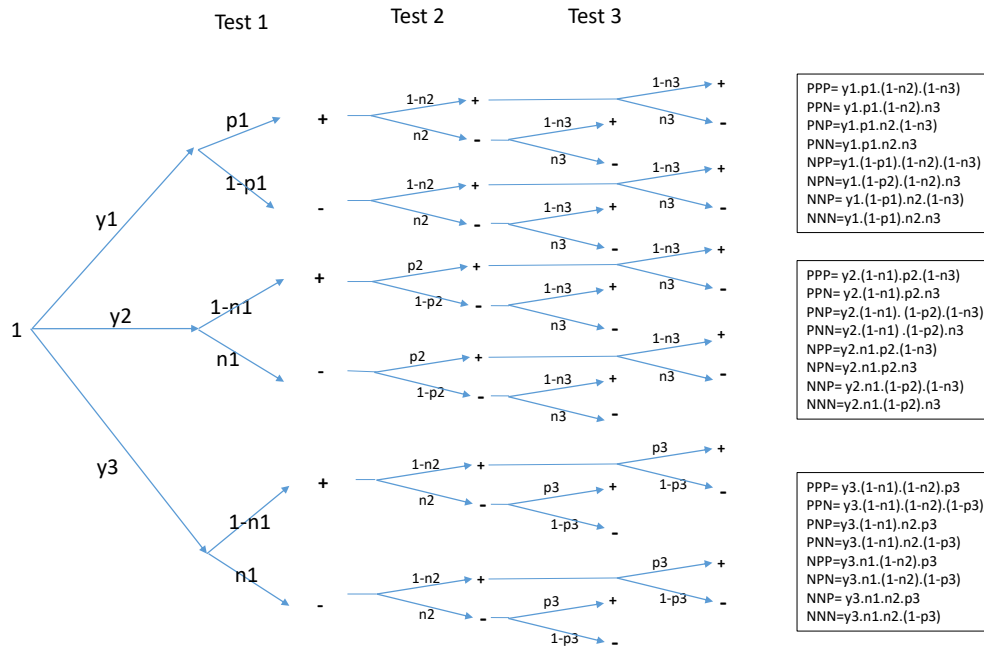

### Decision tree for simultaneous testing

(Here  $y_1, y_2, y_3$  are relative prevalence of disease 1, disease 2 and disease 3 respectively,

Test 1, Test 2, Test 3 are tests for disease 1, disease 2 and disease 2 respectively,

$p_1, p_2, p_3$  are respective sensitivities and  $n_1, n_2$  and  $n_3$  are respective specificities for Test 1, Test 2 and Test 3)

### Simplified equations:

For  $k$  diseases with prevalence given by  $y_1, y_2, y_3 \dots y_k$ , sensitivity of test for respective disease given by  $p_1, p_2, p_3 \dots p_k$  and corresponding specificities given by  $n_1, n_2, n_3 \dots n_k$ , different diagnostic outputs are calculated as follows:

#### Total True Positives

$$TP = y_1.p_1 + y_2.p_2 + y_3.p_3 + \dots + y_k.p_k$$

$$TP = \sum_{i=1}^k y_i . p_i$$

#### Total False Positives

$$FP = (1-y_1).(1-n_1) + (1-y_2).(1-n_2) + (1-y_3).(1-n_3) + \dots + (1-y_k).(1-n_k)$$

$$FP = \sum_{i=1}^k (1 - y_i) . (1 - n_i)$$

#### Total True Negatives

$$TN = (1-y_1).n_1 + (1-y_2).n_2 + (1-y_3).n_3 + \dots + (1-y_k).n_k$$

$$TN = \sum_{i=1}^k (1 - y_i) \cdot n_i$$

Total False Negatives

$$FN = y_1 \cdot (1-p_1) + y_2 \cdot (1-p_2) + y_3 \cdot (1-p_3) + \dots + y_k \cdot (1-p_k)$$

$$FN = \sum_{i=1}^k y_i \cdot (1 - p_i)$$

**Equations: Sequential testing**

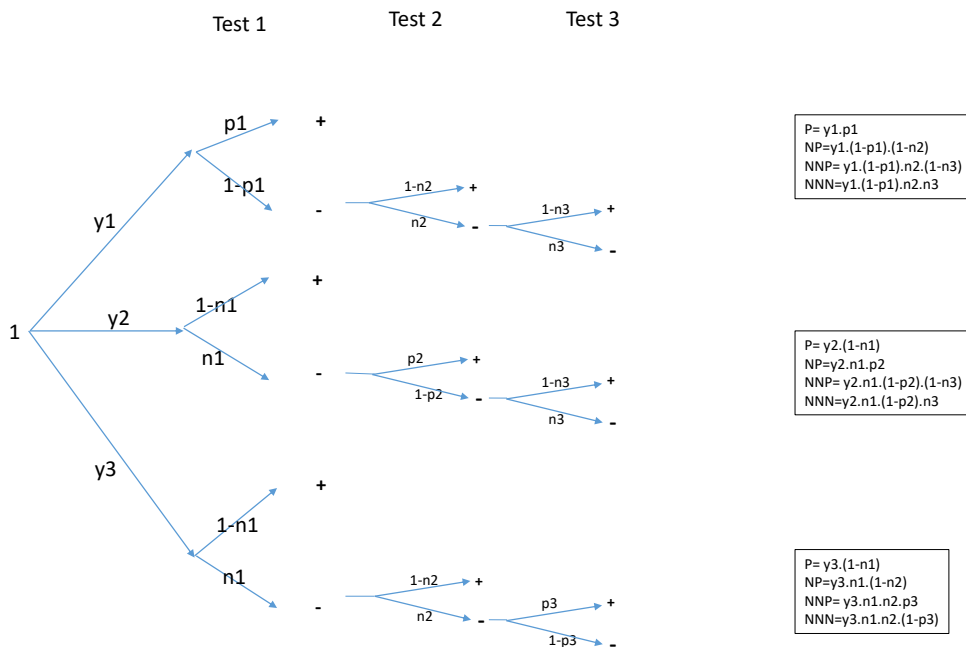

Figure 1: Decision tree for sequential testing

(Here  $y_1, y_2, y_3$  are relative prevalence of disease 1, disease 2 and disease 3 respectively,

Test 1, Test 2, Test 3 are tests for disease 1, disease 2 and disease 2 respectively,

$p_1, p_2, p_3$  are respective sensitivities and  $n_1, n_2$  and  $n_3$  are respective specificities for Test 1, Test 2 and Test 3)

Simplified equations:

Total True Positives (Correct diagnosis score)

$$TP = y_1 \cdot p_1 + y_2 \cdot n_1 \cdot p_2 + y_3 \cdot n_1 \cdot n_2 \cdot p_3 \dots$$

$$TP = \sum_{i=1}^k \frac{y_i p_i \prod_{j=1}^i n_j}{n_i}$$

Total False Positives

$$FP = (y_2 + y_3) \cdot (1-n_1) + y_1 \cdot (1-p_1) \cdot (1-n_2) + y_3 \cdot n_1 \cdot (1-n_2) + y_1 \cdot (1-p_1) \cdot n_2 \cdot (1-n_3) + y_2 \cdot n_1 \cdot (1-p_2) \cdot (1-n_3) + \dots$$

$$FP = \sum_{i=2}^k [ \prod_{m=1}^{i-1} n_m \cdot (1 - n_i) \sum_{j=1}^{i-1} \frac{y_j(1-p_j)}{n_j} ] + \sum_{i=1}^k [ \sum_{j=i+1}^k \frac{y_j(1-n_i) \prod_{m=1}^i n_m}{n_i} ]$$

**Total True Negatives**

$$TN = (y_2+y_3).n_1 + y_1.(1-p_1).n_2 + y_3.n_1.n_2. + y_1.(1-p_1).n_2.n_3 + y_2.n_1.(1-p_2).n_3 + \dots$$

$$TN = \sum_{i=2}^k [ \prod_{m=1}^i n_m \cdot \sum_{j=1}^{i-1} \frac{y_j(1-p_j)}{n_j} ] + \sum_{i=1}^k [ \sum_{j=i+1}^k y_j \prod_{m=1}^i n_m ]$$

**Total False Negatives**

$$FN = y_1.(1-p_1) + y_2.n_1.(1-p_2) + y_3.n_1.n_2.(1-p_3) + \dots$$

$$FN = \sum_{i=1}^k \frac{y_i(1 - p_i) \prod_{j=1}^i n_j}{n_i}$$

**Correct diagnosis:**

Correct diagnosis of each disease while tested in algorithm:

$$CD_i = \frac{y_i p_i \prod_{j=1}^i n_j}{n_i}$$

Correct diagnosis of each disease while tested simultaneously

$$CD_i = \frac{y_i p_i \prod_{j=1}^k n_j}{n_j}$$

Total correct diagnosis while tested in algorithm:

$$CD = \sum_{i=1}^k \frac{y_i p_i \prod_{j=1}^i n_j}{n_i}$$

Total correct diagnosis of while tested simultaneously

$$CD = \sum_{i=1}^k \frac{y_i p_i \prod_{j=1}^k n_j}{n_j}$$

The correct diagnosis of each disease in simultaneous testing is thus the function of relative prevalence of the disease, sensitivity of test for the disease and specificities of all other tests. Similarly, the correct diagnosis of each disease in sequential testing is the function of prevalence of the disease, sensitivity of test for the disease and specificity of all prior tests in the algorithm. This implies that specificity of a component test affects the correct diagnosis of all other diseases in simultaneous testing but influences only the preceding diagnoses in the sequential testing algorithms.

## R script for simultaneous testing

```
#####  
# Program for simultaneous testing of febrile illnesses#  
#####  
# the code uses DescTools and matrixStats packages and for loop function  
  
#call packages  
library(DescTools)  
library(matrixStats)  
  
y<-100          #determine the number of trials  
  
#Initialize output  
OUTpropCD<-matrix(NA, y, 5) #proportion of correct diagnosis for each diagnosis  
OUTsumCD<-c()          #total correct diagnosis  
OUTPPV<-matrix(NA, y, 5) #positive predictive value for each disease diagnosis  
OUTNPV<-matrix(NA, y, 5) #negative predictive value for each disease diagnosis  
  
for (k in 1:y)      #repeats the run for trial  
{  
  #model inputs  
  pv<- c(3, 7, 4, 1, 4)      #prevalance: Malaria, Dengue, Scrub, Typhoid, Lepto in India  
  #pv<- c(31.8, 3.5, 2.1, 0.1, 3.7) # prevalence: : Malaria, Dengue, Scrub, Typhoid, Lepto in Cambodia  
  pvx<-0                    #Other prevalence  
  sn<- c(0.95, 0.842, 0.728, 0.69, 0.71) #Sensitivities of malaria, dengue, scrub, typhoid and lepto test  
  sp<- c(0.952, 0.94, 0.968, 0.9, 0.646) #Specificities of malaria, dengue, scrub, typhoid and lepto test  
  rp<- pv/(sum(pv)+pvx)      #relative prevalances  
  
  #cumulative relative prevalence of five diseases  
  crp1<- rp[1]  
  crp2<- crp1+rp[2]  
  crp3<- crp2+rp[3]  
  crp4<- crp3+rp[4]  
  crp5<- crp4+rp[5]  
  crp<-c(crp1, crp2, crp3, crp4, crp5)  
  
  x<-10000          #determine the number of simulations  
  rand<-runif(x,0,1) #generate random number for each simulation  
  
  #Assign diagnosis based on relative prevalence  
  ds<-c()  
  for(i in 1:x)  
  {  
    if(rand[i]<=crp[1])  
    {ds[i]<-1  
    }  
    else if(rand[i]<=crp[2])  
    {ds[i]<-2  
    }  
    else if(rand[i]<=crp[3])  
    {ds[i]<-3  
    }  
    else if(rand[i]<=crp[4])  
    {ds[i]<-4  
    }  
    else if(rand[i]<=crp[5])  
  }
```

```

{ds[i]<-5
}
else{ds[i]<-0}
}
dis<- c(sum(ds==1),sum(ds==2), sum(ds==3), sum(ds==4), sum(ds==5)) #total pretest diagnosis of five diseases

```

```

#TP for first test
TP1<-c()
for(i in 1:x)
{
if(ds[i]==1 & runif(1)<=sn[1])
{TP1[i]<-1
}
else {TP1[i]<-0}
}

```

```

#FP for first test
FP1<-c()
for(i in 1:x)
{
if(ds[i]!=1 & runif(1)<=(1-sp[1]))
{FP1[i]<-1
}
else{FP1[i]<-0}
}
}

```

```

#TP for second test
TP2<-c()
for(i in 1:x)
{
if(ds[i]==2 & runif(1)<=sn[2])
{TP2[i]<-1
}
else {TP2[i]<-0}
}
}

```

```

#FP for second test
FP2<-c()
for(i in 1:x)
{
if(ds[i]!=2 & runif(1)<=(1-sp[2]))
{FP2[i]<-1
}
else{FP2[i]<-0}
}
}

```

```

#TP for third test
TP3<-c()
for(i in 1:x)
{
if(ds[i]==3 & runif(1)<=sn[3])
{TP3[i]<-1
}
else {TP3[i]<-0}
}
}

```

```

}

#FP for third test
FP3<-c()
for(i in 1:x)
{
  if(ds[i]!=3 & runif(1)<=(1-sp[3]))
  {FP3[i]<-1
  }
  else{FP3[i]<-0
  }
}

#TP for forth test
TP4<-c()
for(i in 1:x)
{
  if(ds[i]==4 & runif(1)<=sn[4])
  {TP4[i]<-1
  }
  else {TP4[i]<-0}
}

#FP for forth test
FP4<-c()
for(i in 1:x)
{
  if(ds[i]!=4 & runif(1)<=(1-sp[4]))
  {FP4[i]<-1
  }
  else{FP4[i]<-0
  }
}

#TP for fifth test
TP5<-c()
for(i in 1:x)
{
  if(ds[i]==5 & runif(1)<=sn[5])
  {TP5[i]<-1
  }
  else {TP5[i]<-0}
}

#FP for fifth test
FP5<-c()
for(i in 1:x)
{
  if(ds[i]!=5 & runif(1)<=(1-sp[5]))
  {FP5[i]<-1
  }
  else{FP5[i]<-0
  }
}
sumTP<- c(sum(TP1), sum(TP2), sum(TP3), sum(TP4), sum(TP5)) #Total true positives for each of five
diseases

```

```

sumFP<- c(sum(FP1), sum(FP2), sum(FP3), sum(FP4), sum(FP5)) #total false positives for each of five diseases
sumToP<- sumTP+sumFP #total positives for five diseases
sumTN<-x-dis-sumFP #true negative for five diseases
sumFN<-dis-sumTP #true negative for five diseases

#calculation of total false positives
FP<-c()
for(i in 1:x)
{
  if(FP1[i]==1 | FP2[i]==1 | FP3[i]==1 | FP4[i]==1 | FP5[i]== 1)
  {FP[i]<-1}
  else{FP[i]<-0}
}
sum(FP)

#calculation of correct diagnosis
CD<-c()
for (i in 1:x)
{if (TP1[i]==1 & FP[i]==0)
{CD[i]<-1}
else if (TP2[i]==1 & FP[i]==0)
{CD[i]<-2}
else if (TP3[i]==1 & FP[i]==0)
{CD[i]<-3}
else if (TP4[i]==1 & FP[i]==0)
{CD[i]<-4}
else if (TP5[i]==1 & FP[i]==0)
{CD[i]<-5}
else {CD[i]<-0}
}

#Outcome calculations
sumCD<-c(sum(CD==1), sum(CD==2), sum(CD==3), sum(CD==4), sum(CD==5)) #number of each cases
correctly diagnosed
ssumCD<-sum(sumCD)/x #proportion of all cases correctly diagnosed
propCD<-sumCD/dis ##proportion of each cases correctly diagnosed
PPV<- sumTP/sumToP #PPV for each test
NPV<- sumTN/(sumTN+sumFN) #NPV for each test
#Defining model output
OUTpropCD[k,]<-propCD
OUTsumCD[k,]<-ssumCD
OUTPPV[k,]<-PPV
OUTNPV[k,]<-NPV
}
#dataframe of outputs
d1<- data.frame(OUTsumCD, OUTpropCD, OUTPPV, OUTNPV)
##calculation of mean outputs from all trials
#Total correct diagnosis, mean and CI

```



```
meansumCD<-mean(OUTsumCD)
#mean proportion of correct diagnosis
meanpropCD<-colMeans2(OUTpropCD, na.rm=FALSE)
#mean PPV for individual tests
meanPPV<- colMeans2(OUTPPV, na.rm=FALSE)
#mean PPV for individual tests
meanNPV<- colMeans2(OUTNPV, na.rm=FALSE)
#Outputs
meansumCD #proportion of ovealrrall correct diagnosis
meanpropCD #proportion of correct diagnosis by case
meanPPV #positive predictive value by case
meanNPV #negative predictive value by case
```

## R script for sequential testing

```
#####  
# Program do develop sequential testing algorithm for febrile illness #  
#####  
# the code uses gtools, data.table and ggplot2, matrixStats, dplyr and blindrcpp packages, permutataion and for  
loop functions.  
  
#call packages  
library(gtools)  
library(data.table)  
library(ggplot2)  
library(matrixStats)  
library(dplyr)  
library(bindrcpp)  
  
# create all possible combinations of tests  
n<- 5 #number of tests  
r<- 5 #number of disease  
perm<-permutations(n, r, v = 1:n) #possible combinations  
  
lp<- length(perm[,1]) #length of permutation vector  
  
# initialise output  
OUTpropCD<-matrix(NA, lp, r) #proportion of correct diagnosis for each diagnosis  
OUTsumCD<-c() #total correct diagnosis  
OUTPPV<-matrix(NA, lp, r) #positive predictive value for each test  
OUTNPV<-matrix(NA, lp, r) #negative predictive value for each test  
OUTCD<-matrix(NA, lp, r) #each test contribution to total correct diagnosis  
OUTCCD<-matrix(NA, lp, r) #cumulative correct diagnosis after every test in algorithm  
  
#Model inputs  
pv<- c(3, 7, 4, 1, 4)#prevalance of malaria, dengue, scrub, typhoid and lepto (India)  
#pv<- c(31.8, 3.5, 2.1, 0.1, 3.7) #prevalance of malaria, dengue, scrub, typhoid and lepto (India)  
pvx<-0 #other prevalence  
sn<- c(0.95, 0.842, 0.728, 0.69, 0.71) #corresponding sensitivity  
sp<- c(0.952, 0.94, 0.968, 0.9, 0.646) #corresponding specificity  
  
for (j in 1:lp) #repeats the run for each of 120 possible algorithm  
{  
  pvj<-pv[perm[j,]]  
  snj<-sn[perm[j,]]  
  spj<-sp[perm[j,]]  
  
  #Define the number of trials for each algorithm  
  y<-100  
  
  #Initialize output  
  OpropCD<-matrix(NA, y, 5) #proportion of correct diagnosis for each disease  
  OsumCD<-c() #total correct diagnosis  
  OPPV<-matrix(NA, y, 5) #positive predictive value for each disease disease  
  OsumPPV<-c() #overall negative predictive value for the whole algorithm  
  ONPV<-matrix(NA, y, 5) #negative predictive value for each disease  
  OsumNPV<-c() #overall positive predictive value for the whole algorithm  
  OCCD<-matrix(NA, y, 5) #cumulative correct diagnosis  
  OCD<-matrix(NA, y, 5) #correct diagnosis for each disease
```

```

for (k in 1:y)      #repeat the simulation for each trial
{
x<-10000 #number of simulations
rand<-runif(x,0,1) #10000 random numbers between 0 and 1

ds <- rep(0, x)
TP1 <- rep(0, x)
FP1 <- rep(0, x)
TP2 <- rep(0, x)
FP2 <- rep(0, x)
TP3 <- rep(0, x)
FP3 <- rep(0, x)
TP4 <- rep(0, x)
FP4 <- rep(0, x)
TP5 <- rep(0, x)
FP5 <- rep(0, x)
TN1 <- rep(0, x)
FN1 <- rep(0, x)
TN2 <- rep(0, x)
FN2 <- rep(0, x)
TN3 <- rep(0, x)
FN3 <- rep(0, x)
TN4 <- rep(0, x)
FN4 <- rep(0, x)
TN5 <- rep(0, x)
FN5 <- rep(0, x)
CD1 <- rep(0, x)
CD2 <- rep(0, x)
CD3 <- rep(0, x)
CD4 <- rep(0, x)
CD5 <- rep(0, x)

pvj <- pv[perm[j, ]]
snj <- sn[perm[j, ]]
spj <- sp[perm[j, ]]

rp <- pvj/(sum(pvj)+pvx) #relative prevalence
crp <- cumsum(rp) #cumulative relative prevalence

rand<-runif(x, 0, 1) #x random numbers between 0 and 1; each random generates a patient

rand_unif <- matrix(runif(10*x, 0, 1), x, 10)

for(i in 1:x)
{
#Assign diagnosis based on pretest probability
v <- which(rand[i] <= crp)
if(any(v)) ds[i] <- min(v)
}

TP1[ds == 1 & rand_unif[, 1] <= snj[1]] <- 1
FP1[ds != 1 & rand_unif[, 2] <= (1 - spj[1])] <- 1
TP2[ds == 2 & TP1 == 0 & FP1 == 0 & rand_unif[, 3]<=snj[2]] <- 1
FP2[ds != 2 & TP1 == 0 & FP1 == 0 & rand_unif[, 4]<=(1-spj[2])] <- 1
TP3[ds == 3 & TP1 == 0 & FP1 == 0 & TP2 == 0 & FP2 == 0 & rand_unif[, 5]<=snj[3]] <- 1
FP3[ds != 3 & TP1 == 0 & FP1 == 0 & TP2 == 0 & FP2 == 0 & rand_unif[, 6]<=(1-spj[3])] <- 1

```

```

TP4[ds == 4 & TP1 == 0 & FP1 == 0 & TP2 == 0 & FP2 == 0 & TP3 == 0 & FP3 == 0 & rand_unif[,
7]<=snj[4]] <- 1
FP4[ds != 4 & TP1 == 0 & FP1 == 0 & TP2 == 0 & FP2 == 0 & TP3 == 0 & FP3 == 0 & rand_unif[, 8]<=(1-
spj[4])] <- 1
TP5[ds == 5 & TP1 == 0 & FP1 == 0 & TP2 == 0 & FP2 == 0 & TP3 == 0 & FP3 == 0 & TP4 == 0 & FP4 == 0
& rand_unif[, 9]<=snj[5]] <- 1
FP5[ds != 5 & TP1 == 0 & FP1 == 0 & TP2 == 0 & FP2 == 0 & TP3 == 0 & FP3 == 0 & TP4 == 0 & FP4 == 0
& rand_unif[, 10]<=(1-spj[5])] <- 1

TN1[ds != 1 & FP1 == 0] <- 1
FN1[ds == 1 & TP1 == 0] <- 1
TN2[ds != 2 & TP1 == 0 & FP1 == 0 & FP2 == 0] <- 1
FN2[ds == 2 & TP1 == 0 & FP1 == 0 & TP2 == 0] <- 1
TN3[ds != 3 & TP1 == 0 & FP1 == 0 & TP2 == 0 & FP2 == 0 & FP3 == 0] <- 1
FN3[ds == 3 & TP1 == 0 & FP1 == 0 & TP2 == 0 & FP2 == 0 & TP3 == 0] <- 1
TN4[ds != 4 & TP1 == 0 & FP1 == 0 & TP2 == 0 & FP2 == 0 & TP3 == 0 & FP3 == 0 & FP4 == 0] <- 1
FN4[ds == 4 & TP1 == 0 & FP1 == 0 & TP2 == 0 & FP2 == 0 & TP3 == 0 & FP3 == 0 & TP4 == 0] <- 1
TN5[ds != 5 & TP1 == 0 & FP1 == 0 & TP2 == 0 & FP2 == 0 & TP3 == 0 & FP3 == 0 & TP4 == 0 & FP4 == 0
& FP5 == 0] <- 1
FN5[ds == 5 & TP1 == 0 & FP1 == 0 & TP2 == 0 & FP2 == 0 & TP3 == 0 & FP3 == 0 & TP4 == 0 & FP4 == 0
& TP5 == 0] <- 1

CD1[TP1==1]<-1
CD2[TP2==1]<-1
CD3[TP3==1]<-1
CD4[TP4==1]<-1
CD5[TP5==1]<-1

dis<- c(sum(ds==1),sum(ds==2), sum(ds==3), sum(ds==4), sum(ds==5) ) # QUESTION: Should you not record
the case ds == 0? (Ans: not required at this time)

sumTP<- c(sum(TP1), sum(TP2), sum(TP3), sum(TP4), sum(TP5)) #total true positives for each test

sumFP<- c(sum(FP1), sum(FP2), sum(FP3), sum(FP4), sum(FP5)) #total false positives for each test

sumToP<- sumTP+sumFP #total positives for each test

sumTN<- c(sum(TN1), sum(TN2), sum(TN3), sum(TN4), sum(TN5)) #total true negatives for each test

sumFN<- c(sum(FN1), sum(FN2), sum(FN3), sum(FN4), sum(FN5)) #total false negatives

#Outcome calculations for each run

sumCD<-c(sum(CD1), sum(CD2), sum(CD3), sum(CD4), sum(CD5)) #number of correct diagnosis for each test

#Cumulative correct diagnosis (proportion)
CCD<- c(sumCD[1]/x, (sumCD[1]+sumCD[2])/x, (sumCD[1]+sumCD[2]+sumCD[3])/x,
(sumCD[1]+sumCD[2]+sumCD[3]+sumCD[4])/x,
(sumCD[1]+sumCD[2]+sumCD[3]+sumCD[4]+sumCD[5])/x)

#proportion of each conditions correctly diagnosed (denominator= each disease)
propCD<-sumCD/dis

#contribution of each test to correct diagnosis (denominator= total population)
sCD<- sumCD/x

```

```

#proportions of all cases correctly diagnosed
ssumCD<- sum(sumCD)/x

#predictive values for every test in each algorithm
PPV<- sumTP/sumToP
NPV<- sumTN/(sumTN+sumFN)

#Define outputs each simulation
OpropCD[k,]<-propCD      #proportion of each cases correctly diagnosed
OsumCD[k,]<-ssumCD      #proportion of all cases correctly diagnosed
OPPV[k,]<-PPV           #PPV of each test
ONPV[k,]<-NPV           #NPV of each test
OCCD[k,]<-CCD           #cumulative correct diagnosis after each test
OCD[k,]<-sCD            #each test contribution to correct diagnosis
}

#calculate mean outputs from trials
meansumCD<-mean(OsumCD)      #mean total correct diagnosis score

meanpropCD<-colMeans2(OpropCD, na.rm=FALSE)      #mean proportion of correct diagnosis

meanPPV<- colMeans2(OPPV, na.rm=FALSE)      #mean PPV for individual tests

meanNPV<- colMeans2(ONPV, na.rm=FALSE)      #mean NPV for individual tests

meanCCD<- colMeans2(OCCD, na.rm=FALSE)      #mean cumulative correct diagnosis

meanCD<- colMeans2(OCD, na.rm=FALSE)      #mean of each test contribution to correct diagnosis

#Define Output for each combination of test
OUTpropCD[j,]<-meanpropCD
OUTsumCD[j,]<-meansumCD
OUTPPV[j,]<-meanPPV
OUTNPV[j,]<-meanNPV
OUTCCD[j,]<-meanCCD
OUTCD[j,]<-meanCD
}

#data frame of required data
df<-data.frame(perm, OUTsumCD, OUTCD, OUTCCD, OUTpropCD, OUTPPV, OUTNPV)
#df
df1<-df[order(df$OUTsumCD, decreasing = TRUE),] #orders dataframe in descending order of total correct
diagnosis

#rename column headings
setnames(df1, old = c('X1','X2','X3','X4','X5','OUTsumCD','X1.2','X2.2','X3.2','X4.2',
                      'X5.2'), new = c('test1','test2', 'test3','test4',
                      'test5', 'correctly diagnosed','Cum dx1','Cum dx2','Cum dx3','Cum dx4',
                      'Cum dx5'))
df1$test1[df1$test1==1]<-"Malaria"
df1$test1[df1$test1==2]<-"Dengue"
df1$test1[df1$test1==3]<-"Scrub typhus"
df1$test1[df1$test1==4]<-"Typhoid"
df1$test1[df1$test1==5]<-"Leptospira"
df1$test2[df1$test2==1]<-"Malaria"

```

```

df1$test2[df1$test2==2]<-"Dengue"
df1$test2[df1$test2==3]<-"Scrub typhus"
df1$test2[df1$test2==4]<-"Typhoid"
df1$test2[df1$test2==5]<-"Leptospira"
df1$test3[df1$test3==1]<-"Malaria"
df1$test3[df1$test3==2]<-"Dengue"
df1$test3[df1$test3==3]<-"Scrub typhus"
df1$test3[df1$test3==4]<-"Typhoid"
df1$test3[df1$test3==5]<-"Leptospira"
df1$test4[df1$test4==1]<-"Malaria"
df1$test4[df1$test4==2]<-"Dengue"
df1$test4[df1$test4==3]<-"Scrub typhus"
df1$test4[df1$test4==4]<-"Typhoid"
df1$test4[df1$test4==5]<-"Leptospira"
df1$test5[df1$test5==1]<-"Malaria"
df1$test5[df1$test5==2]<-"Dengue"
df1$test5[df1$test5==3]<-"Scrub typhus"
df1$test5[df1$test5==4]<-"Typhoid"
df1$test5[df1$test5==5]<-"Leptospira"

#algorithm for best correct diagnosis
a1<-which(OUTsumCD==max(OUTsumCD))

#Plot all algorithms with contribution of each test to correct diagnosis
d1 <- data.frame(Algorithms=factor(paste0("", 1:120),
                                levels =rev(paste0("", 1:120))), data.frame(df1$test1,
                                df1$test2, df1$test3, df1$test4, df1$test5))
d1m <- melt(d1, id.var = 'Algorithms')
d2<-data.frame(Algorithm=factor(paste0("", 1:120), levels =(paste0("", 1:120))), df1$X1.1,
              df1$X2.1, df1$X3.1, df1$X4.1, df1$X5.1)
d2M<-melt(d2, id.vars="Algorithm")
d2m<- data.table(d2M$Algorithm, d1m$variable, d1m$value, d2M$value)
d2m$CD<-df1$`correctly diagnosed`
d2m$rank_test <- substr(d2m$V2, start = 9, stop = 10)
d2m$rank_test <- factor(d2m$rank_test)
d2m$V3 <- as.character(d2m$V3)
p2 <- ggplot(d2m, aes(x = V1, y = V4, order = rev(rank_test), fill = V3)) +
  geom_bar(position = "stack", stat = "identity", width=0.7) +
  geom_label(data = d2m %>%
            filter(row_number() %% 10 == 2),
            aes(y = CD, label = round(CD, 2)), fill = 'grey', nudge_y = 0.03) +
  scale_fill_brewer(palette = "Set1") +
  scale_y_continuous(limits = c(0, 1), expand = c(0, 0)) +
  scale_x_discrete(expand = c(0.02, 0)) +
  labs(title = "A. India", x = NULL,
       y = "Proportions of cases correctly diagnosed") +
  theme_minimal(base_size = 16) +
  theme(axis.text.x = element_blank(), axis.ticks.x = element_blank(),
        legend.position = "bottom", legend.text = element_text(size = 14,
        margin = margin(r = 0.2, unit = 'in')), legend.title = element_blank())

```

p2
